# Supplementary material
Source: PubMed Central journal article supplement (PMC5539991)

## SUPPLEMENTAL MATERIAL

### **Additional Acknowledgments**

We gratefully acknowledge the participation of *Pediatric Cardiac Genomics Consortium* investigators:

George A. Porter Jr. (University of Rochester Medical Center), Richard Kim (University of Southern California Keck School of Medicine), Angela Romano (Alexandra Cohen Children's Medical Center of New York), Mark Daly (Harvard Medical School), Mark W. Russell (University of Michigan), Amy E. Roberts (Boston Children's Hospital), Jane W. Newburger (Boston Children's Hospital), Roger E. Breitbart (Boston Children's Hospital), Jonathan R. Kaltman (NHLBI/NIH), Martina Brueckner (Yale University School of Medicine), Richard P. Lifton (Yale University School of Medicine), Bruce D. Gelb (Icahn School of Medicine at Mount Sinai), Christine E. Seidman (Harvard Medical School), and Wendy K. Chung (Columbia University Medical Center).

We also acknowledge the assistance of coordinators from the *Pediatric Cardiac Genomics Consortium*: D. Awad, C. Breton, K. Celia, C. Duarte, D. Etwaru, N. Fishman, M. Kaspakova, J. Kline, R. Korsin, A. Lanz, E. Marquez, D. Queen, A. Rodriguez, J. Rose, J. K. Sond, D. Warburton, A. Wilpers, and R. Yee (Columbia Medical School); J. Geva, B. McDonough, A. Monafo, J. Stryker (Harvard Medical School); N. Cross (Yale School of Medicine); S. M. Edman, J. L. Garbarini, J. E. Tusi, S. H. Woyciechowski (Children's Hospital of Philadelphia); J. Ellashek and N. Tran (Children's Hospital of Los Angeles); K. Flack L. Panesar, N. Taylor (University College London); D. Gruber and N. Stellato (Steve and Alexandra Cohen Children's Medical Center of New York); D. Guevara, A. Julian, M. Mac Neal, C. Mintz (Icahn School of Medicine at Mount Sinai); and E. Taillie (University of Rochester School of Medicine and Dentistry).

## **Supplemental Data Description**

### Supplemental Table 1

Summary data for significant associations between inherited variants and CTDs among the CHOP CTD case-control analysis ( $p \leq 5 \times 10^{-8}$ )

### Supplemental Table 2 (separate Excel file)

Summary data for suggestive associations between maternal variants and CTDs+LVOTDs from the meta-analysis ( $p \leq 10^{-5}$ )

### Supplemental Table 3 (separate Excel file)

Summary data for suggestive associations between maternal variants and CTDs from the meta-analysis ( $p \leq 10^{-5}$ )

### Supplemental Table 4 (separate Excel file)

Summary data for suggestive associations between maternal variants and LVOTDs from the meta-analysis ( $p \leq 10^{-5}$ )

### Supplemental Table 5 (separate Excel file)

Summary data for suggestive associations between inherited variants and CTDs+LVOTDs from the meta-analysis ( $p \leq 10^{-5}$ )

### Supplemental Table 6 (separate Excel file)

Summary data for suggestive associations between inherited variants and CTDs from the meta-analysis ( $p \leq 10^{-5}$ )

### Supplemental Table 7 (separate Excel file)

Summary data for suggestive associations between inherited variants and LVOTDs from the meta-analysis ( $p \leq 10^{-5}$ )

### Supplemental Table 8 (separate Excel file)

Our meta-analysis results for variants reported in previous GWAS of heart defects

### Supplemental Figure 1

Quantile-quantile plots for the meta-analysis of: A) inherited variants and CTDs+LVOTDs, B) inherited variants and any CTDs, C) inherited variants and LVOTDs, D) maternal variants and CTDs+LVOTDs, E) maternal variants and any CTDs, F) maternal variants and LVOTDs

### Supplemental Figure 2

Manhattan plot for the meta-analysis of: A) inherited variants and CTDs+LVOTDs, B) inherited variants and any CTDs, C) inherited variants and LVOTDs, D) maternal variants and CTDs+LVOTDs, E) maternal variants and any CTDs, F) maternal variants and LVOTDs

**Supplemental Table 1. Results for inherited variants associated with heart defects ( $p < 5 \times 10^{-8}$ ) in the CHOP CTD case-control analysis<sup>A</sup>**

| SNP        | Chr <sup>B</sup> | Position <sup>C</sup> (bp) | Gene          | Function | P-value  | Odds ratio<br>(95% CI) <sup>D</sup> | CADD <sup>E</sup> | GWAVA-TSS<br>score |
|------------|------------------|----------------------------|---------------|----------|----------|-------------------------------------|-------------------|--------------------|
| rs2765283  | 1                | 118536418                  | <i>SPAG17</i> | Intron   | 8.25E-09 | 0.53 (0.42-0.66)                    | 5.45              | 0.34               |
| rs11816696 | 10               | 25362890                   | Intergenic    | -        | 5.44E-09 | 1.55 (1.33-1.80)                    | 3.67              | 0.32               |
| rs1689340  | 12               | 86574519                   | <i>MGAT4C</i> | Intron   | 2.02E-10 | 1.78 (1.49-2.14)                    | 3.09              | 0.28               |
| rs1689357  | 12               | 86618937                   | <i>MGAT4C</i> | Intron   | 4.54E-09 | 1.70 (1.42-2.04)                    | 2.04              | 0.30               |
| rs1698787  | 12               | 86618008                   | <i>MGAT4C</i> | Intron   | 5.38E-09 | 1.69 (1.41-2.03)                    | 1.95              | 0.32               |
| rs2452814  | 12               | 86586255                   | <i>MGAT4C</i> | Intron   | 1.04E-10 | 1.79 (1.50-2.15)                    | 0.57              | 0.23               |
| rs6538022  | 12               | 86584173                   | <i>MGAT4C</i> | Intron   | 1.98E-10 | 1.78 (1.48-2.14)                    | 0.73              | 0.36               |
| rs6538023  | 12               | 86585133                   | <i>MGAT4C</i> | Intron   | 6.57E-11 | 2.00 (1.61-2.48)                    | 0.60              | 0.25               |
| rs6538024  | 12               | 86585136                   | <i>MGAT4C</i> | Intron   | 3.21E-11 | 1.95 (1.59-2.38)                    | 0.57              | 0.21               |
| rs6538025  | 12               | 86600196                   | <i>MGAT4C</i> | Intron   | 1.45E-09 | 1.72 (1.44-2.06)                    | 1.44              | 0.35               |
| rs6538026  | 12               | 86600321                   | <i>MGAT4C</i> | Intron   | 2.94E-10 | 1.77 (1.47-2.12)                    | 1.90              | 0.26               |
| rs709812   | 12               | 86608050                   | <i>MGAT4C</i> | Intron   | 2.03E-09 | 1.72 (1.43-2.06)                    | 1.79              | 0.31               |
| rs7956812  | 12               | 86592670                   | <i>MGAT4C</i> | Intron   | 5.19E-14 | 1.94 (1.62-2.31)                    | 2.22              | 0.30               |
| rs839101   | 12               | 86574359                   | <i>MGAT4C</i> | Intron   | 2.38E-10 | 1.78 (1.48-2.14)                    | 0.99              | 0.24               |
| rs839102   | 12               | 86578110                   | <i>MGAT4C</i> | Intron   | 1.4E-10  | 1.79 (1.49-2.15)                    | 2.76              | 0.35               |
| rs839103   | 12               | 86582700                   | <i>MGAT4C</i> | Intron   | 3.5E-10  | 1.77 (1.47-2.13)                    | 1.27              | 0.24               |
| rs839104   | 12               | 86608721                   | <i>MGAT4C</i> | Intron   | 3.25E-09 | 1.71 (1.43-2.05)                    | 4.08              | 0.24               |
| rs839105   | 12               | 86609200                   | <i>MGAT4C</i> | Intron   | 1.36E-08 | 1.67 (1.39-2.00)                    | 4.95              | 0.24               |
| rs839108   | 12               | 86569704                   | <i>MGAT4C</i> | Intron   | 1.79E-08 | 1.65 (1.38-1.97)                    | 0.02              | 0.29               |
| rs839148   | 12               | 86598998                   | <i>MGAT4C</i> | Intron   | 1.65E-11 | 1.82 (1.52-2.18)                    | 2.54              | 0.23               |
| rs839149   | 12               | 86598656                   | <i>MGAT4C</i> | Intron   | 1.38E-12 | 1.88 (1.57-2.26)                    | 1.96              | 0.31               |
| rs839150   | 12               | 86598519                   | <i>MGAT4C</i> | Intron   | 4.55E-12 | 1.85 (1.55-2.21)                    | 0.57              | 0.29               |
| rs839151   | 12               | 86597014                   | <i>MGAT4C</i> | Intron   | 2.89E-14 | 1.95 (1.63-2.33)                    | 1.49              | 0.27               |
| rs839152   | 12               | 86597000                   | <i>MGAT4C</i> | Intron   | 1.02E-15 | 2.15 (1.77-2.61)                    | 0.54              | 0.28               |
| rs839153   | 12               | 86596980                   | <i>MGAT4C</i> | Intron   | 2.89E-14 | 1.95 (1.63-2.33)                    | 2.46              | 0.31               |
| rs839154   | 12               | 86596330                   | <i>MGAT4C</i> | Intron   | 2.89E-14 | 1.95 (1.63-2.33)                    | 5.99              | 0.28               |
| rs839155   | 12               | 86595986                   | <i>MGAT4C</i> | Intron   | 2.55E-13 | 1.90 (1.59-2.27)                    | 0.88              | 0.21               |
| rs839156   | 12               | 86595690                   | <i>MGAT4C</i> | Intron   | 1.67E-15 | 2.14 (1.76-2.60)                    | 0.21              | 0.26               |
| rs839157   | 12               | 86595546                   | <i>MGAT4C</i> | Intron   | 5.47E-14 | 1.93 (1.62-2.31)                    | 0.63              | 0.23               |
| rs839158   | 12               | 86595472                   | <i>MGAT4C</i> | Intron   | 5.47E-14 | 1.93 (1.62-2.31)                    | 1.16              | 0.22               |
| rs839159   | 12               | 86593708                   | <i>MGAT4C</i> | Intron   | 5.26E-14 | 1.94 (1.62-2.31)                    | 4.74              | 0.24               |
| rs839160   | 12               | 86593387                   | <i>MGAT4C</i> | Intron   | 5.26E-14 | 1.94 (1.62-2.31)                    | 3.42              | 0.21               |
| rs839162   | 12               | 86590307                   | <i>MGAT4C</i> | Intron   | 2.84E-12 | 2.05 (1.66-2.52)                    | 1.33              | 0.29               |
| rs839163   | 12               | 86588732                   | <i>MGAT4C</i> | Intron   | 3.61E-14 | 1.96 (1.63-2.34)                    | 11.54             | 0.37               |
| rs839164   | 12               | 86587630                   | <i>MGAT4C</i> | Intron   | 2.42E-13 | 1.92 (1.60-2.30)                    | 5.32              | 0.32               |
| rs839165   | 12               | 86586654                   | <i>MGAT4C</i> | Intron   | 1.04E-10 | 1.79 (1.50-2.15)                    | 9.61              | 0.30               |

|           |    |          |               |        |          |                  |       |      |
|-----------|----|----------|---------------|--------|----------|------------------|-------|------|
| rs839166  | 12 | 86586394 | <i>MGAT4C</i> | Intron | 4E-11    | 1.94 (1.59-2.37) | 7.67  | 0.25 |
| rs839168  | 12 | 86603948 | <i>MGAT4C</i> | Intron | 2.36E-09 | 1.72 (1.43-2.06) | 0.22  | 0.36 |
| rs839170  | 12 | 86600854 | <i>MGAT4C</i> | Intron | 3.05E-10 | 1.76 (1.47-2.12) | 3.33  | 0.26 |
| rs839171  | 12 | 86600654 | <i>MGAT4C</i> | Intron | 4.08E-10 | 1.76 (1.47-2.12) | 1.41  | 0.22 |
| rs839172  | 12 | 86599496 | <i>MGAT4C</i> | Intron | 2.28E-11 | 1.82 (1.52-2.18) | 0.75  | 0.24 |
| rs844432  | 12 | 86595009 | <i>MGAT4C</i> | Intron | 5.52E-14 | 1.93 (1.62-2.31) | 0.80  | 0.29 |
| rs844434  | 12 | 86601871 | <i>MGAT4C</i> | Intron | 3.9E-10  | 1.86 (1.52-2.27) | 0.23  | 0.40 |
| rs844435  | 12 | 86599670 | <i>MGAT4C</i> | Intron | 2.28E-11 | 1.82 (1.52-2.18) | 0.72  | 0.23 |
| rs844436  | 12 | 86599573 | <i>MGAT4C</i> | Intron | 2.28E-11 | 1.82 (1.52-2.18) | 1.23  | 0.24 |
| rs860813  | 12 | 86599579 | <i>MGAT4C</i> | Intron | 2.28E-11 | 1.82 (1.52-2.18) | 0.76  | 0.26 |
| rs863392  | 12 | 86580946 | <i>MGAT4C</i> | Intron | 1.99E-10 | 1.78 (1.48-2.14) | 12.10 | 0.33 |
| rs863394  | 12 | 86594783 | <i>MGAT4C</i> | Intron | 1.71E-15 | 2.14 (1.76-2.60) | 4.80  | 0.19 |
| rs863395  | 12 | 86593101 | <i>MGAT4C</i> | Intron | 5.26E-14 | 1.94 (1.62-2.31) | 4.83  | 0.25 |
| rs865138  | 12 | 86583292 | <i>MGAT4C</i> | Intron | 1.85E-10 | 1.78 (1.49-2.14) | 0.16  | 0.42 |
| rs865721  | 12 | 86589761 | <i>MGAT4C</i> | Intron | 1.67E-15 | 2.16 (1.77-2.63) | 0.48  | 0.32 |
| rs2406176 | 21 | 19719426 | <i>PRSS7</i>  | Intron | 6.99E-09 | 1.60 (1.36-1.88) | 6.49  | 0.32 |

<sup>A</sup> None of the eight other GWAS of maternal or inherited SNPs identified GWAS-significant associations ( $p < 5 \times 10^{-8}$ ) with heart defects

<sup>B</sup> Chromosome

<sup>C</sup> Hg19/NCBI build 37

<sup>D</sup> Estimate for carrying one copy of the high-risk allele compared to no copies, and corresponding 95% confidence interval

<sup>E</sup> Scaled CADD score

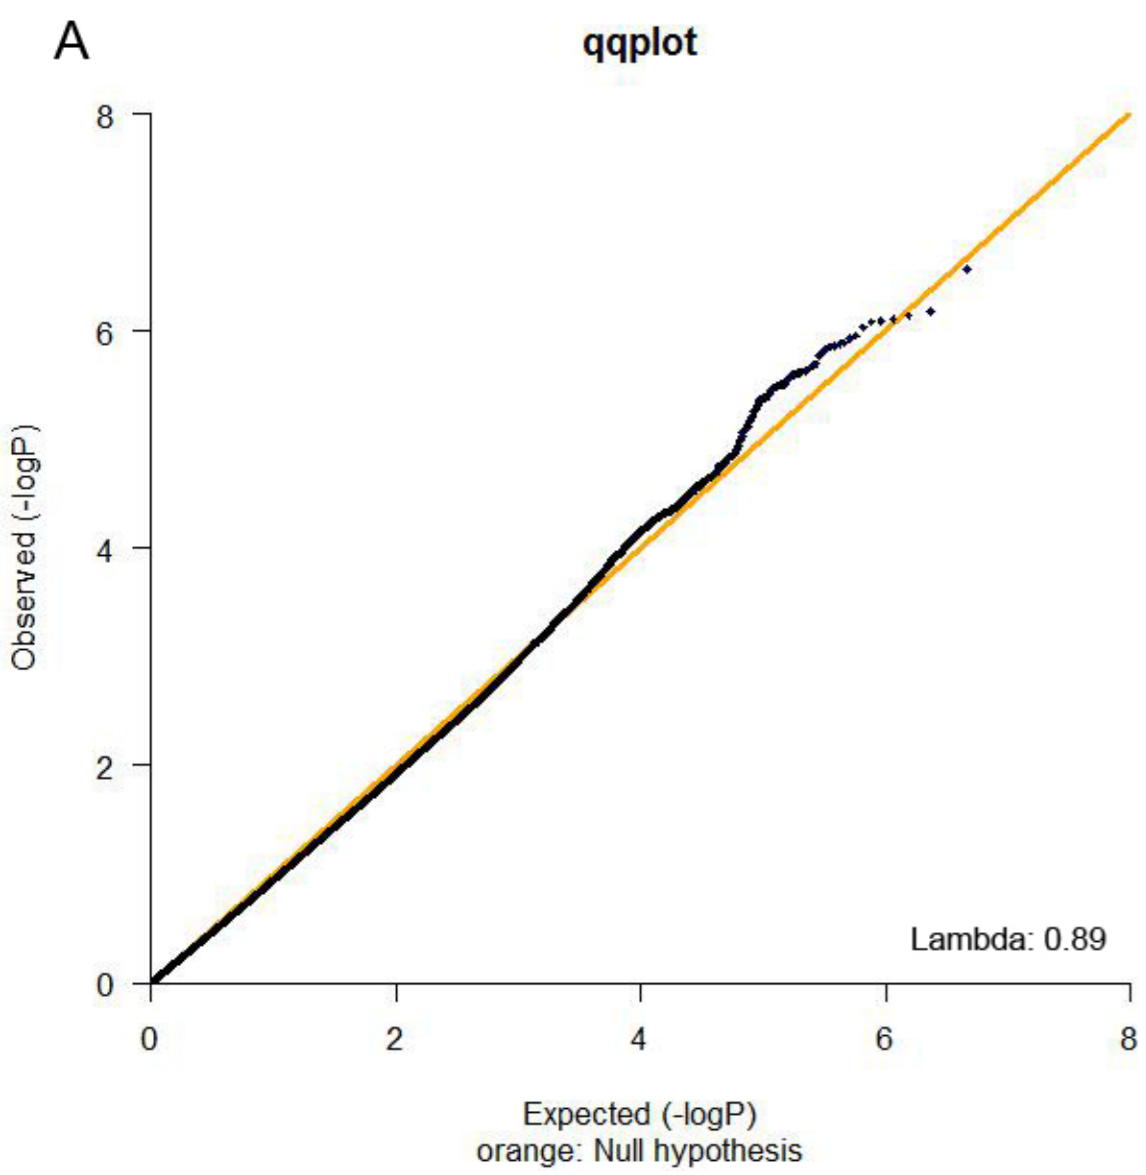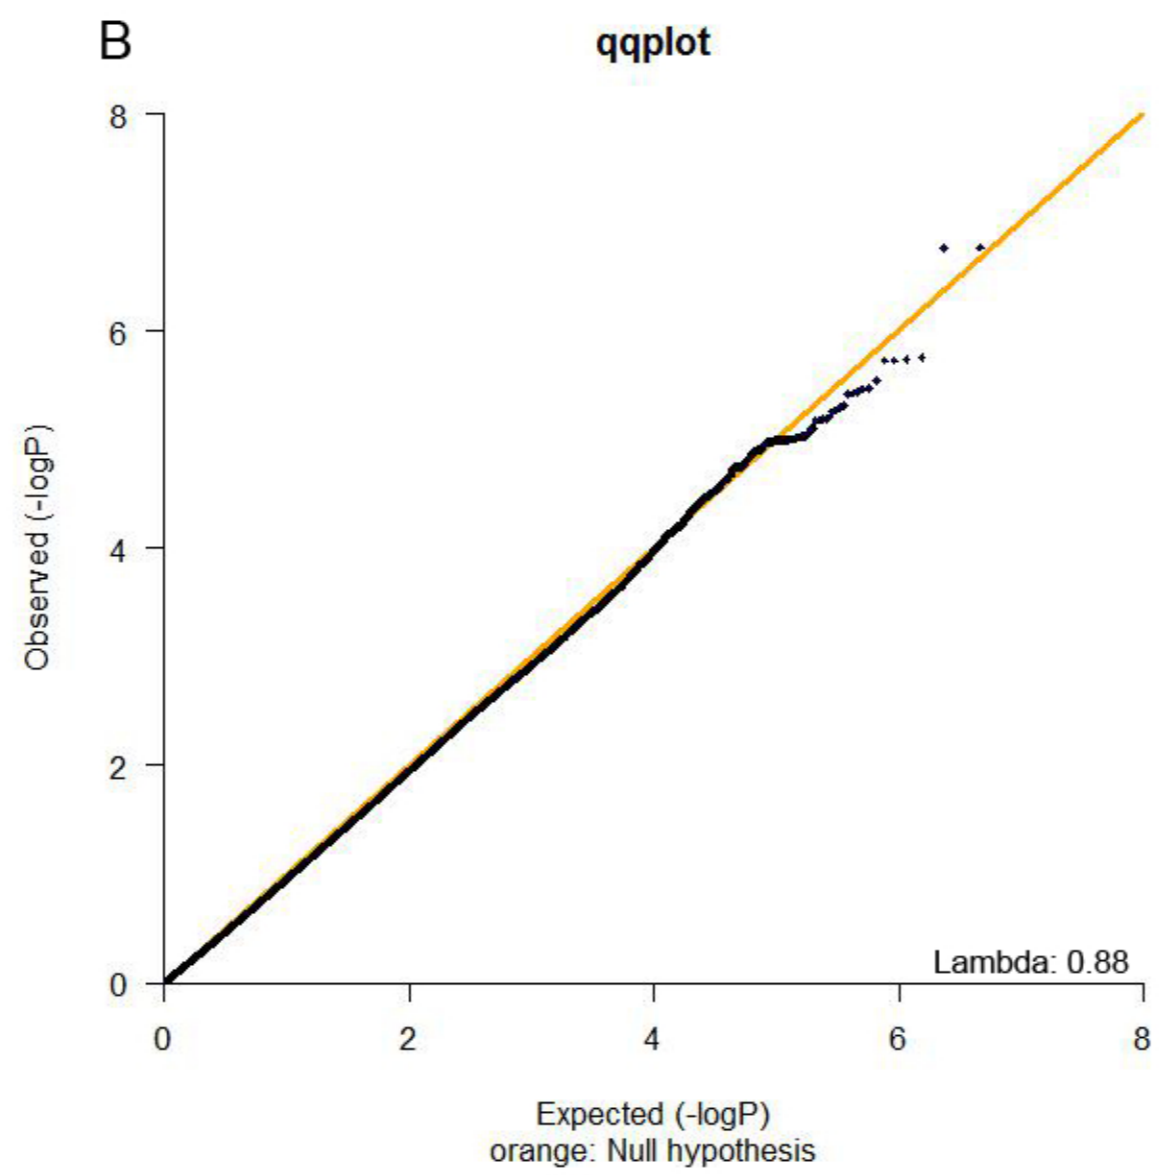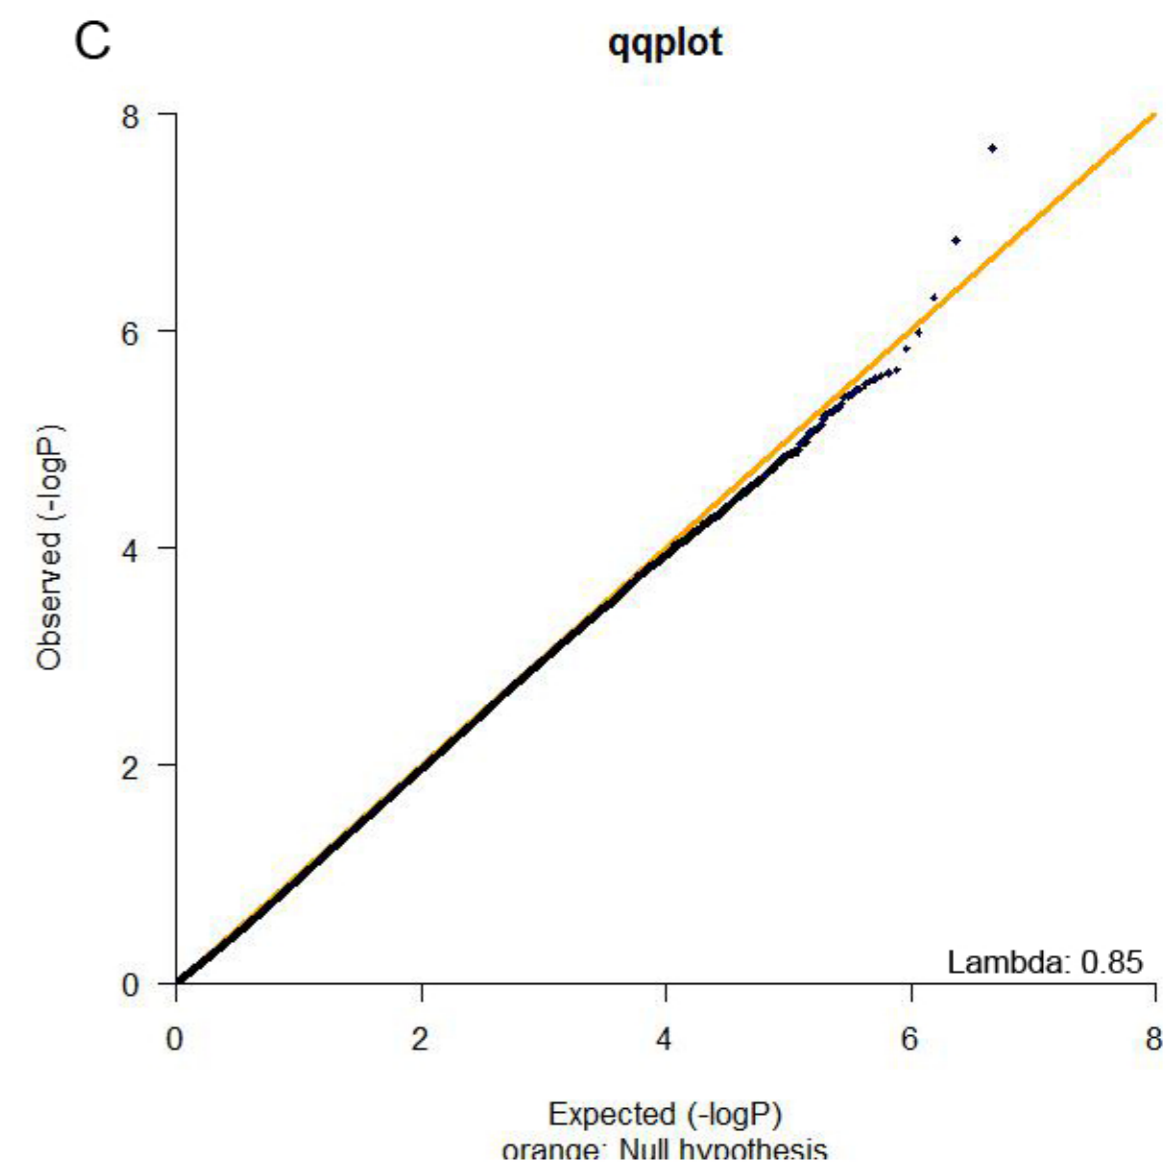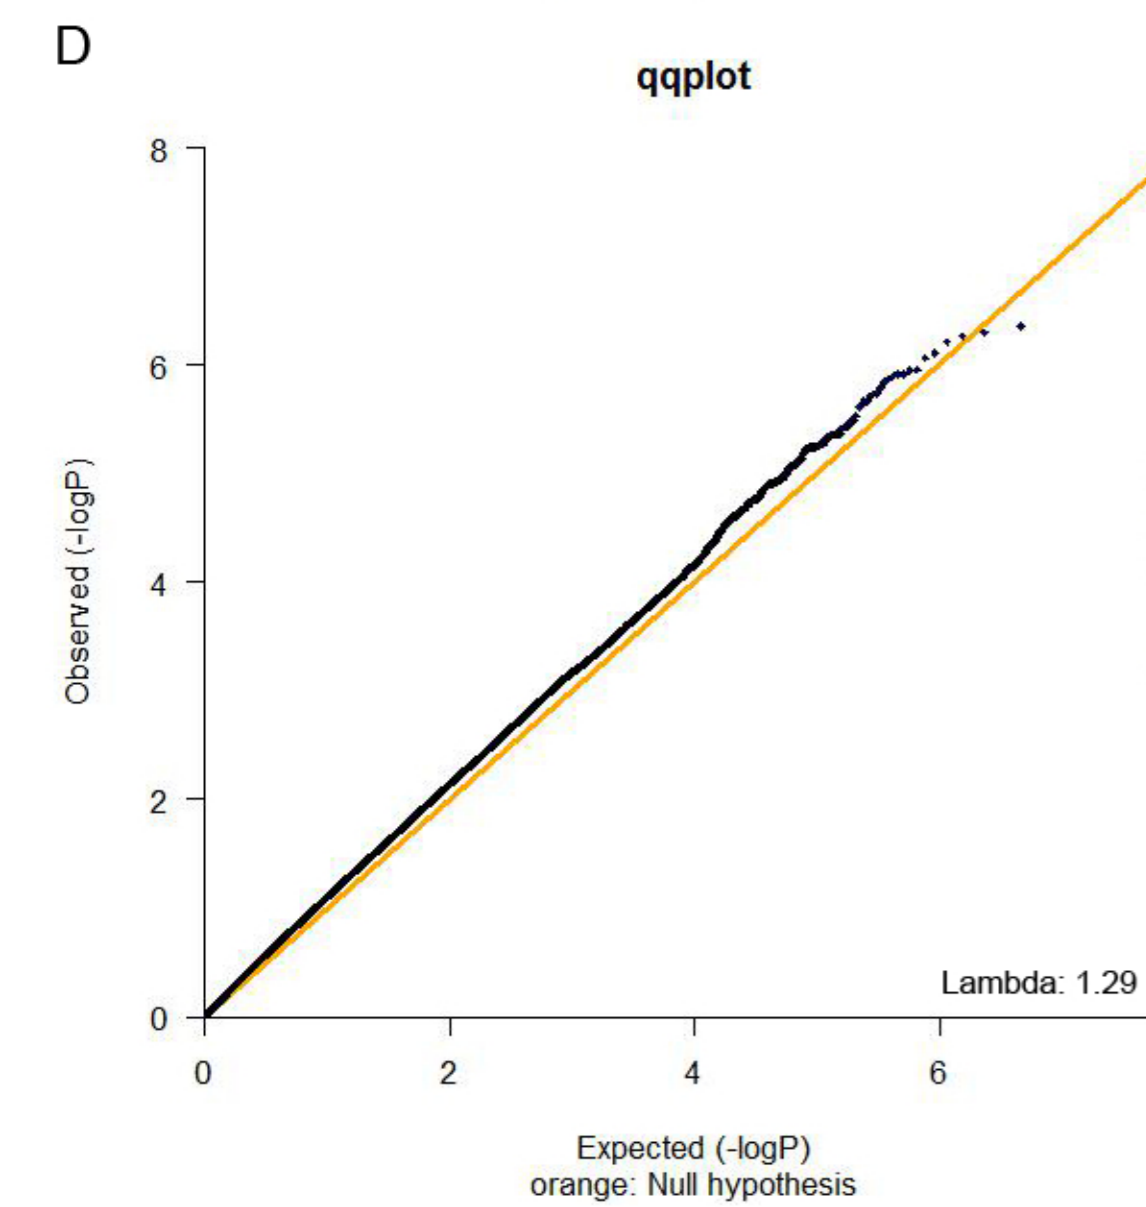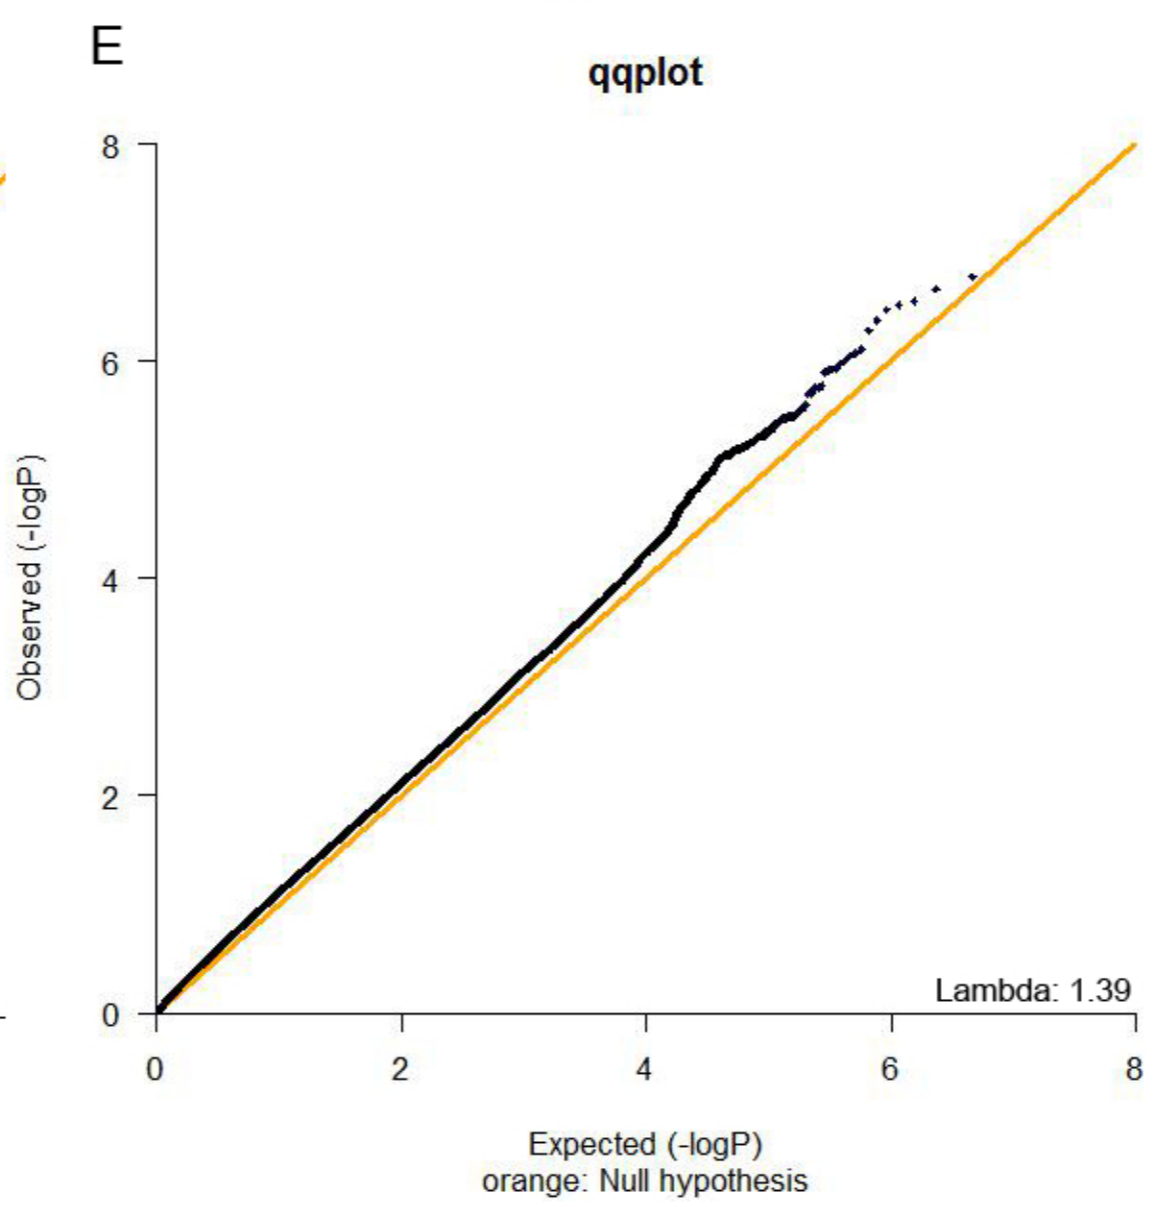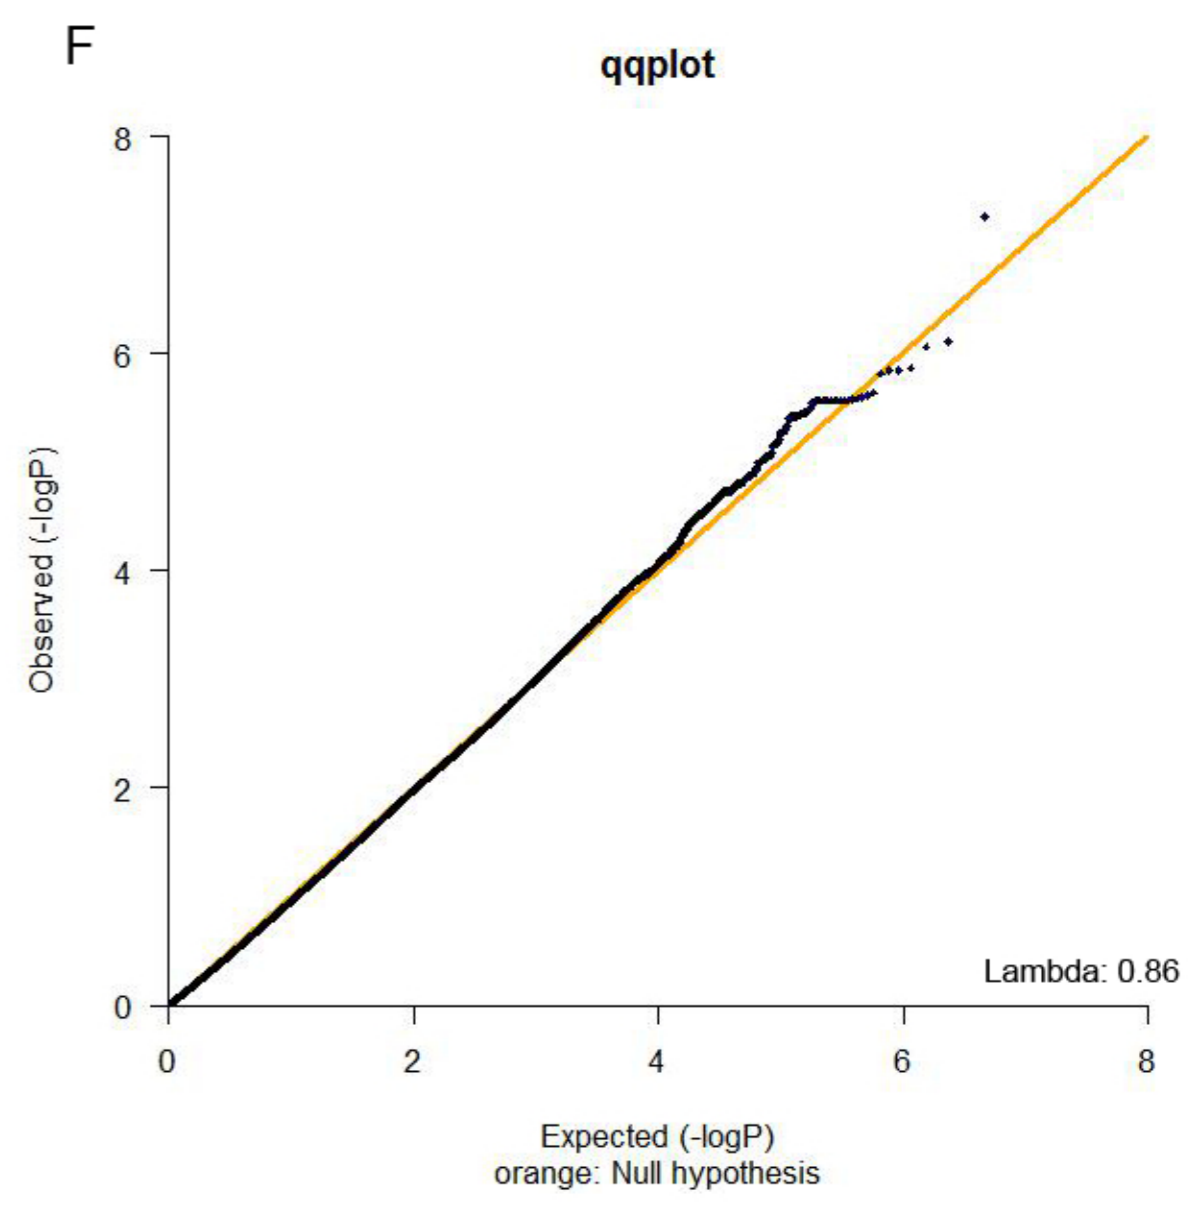

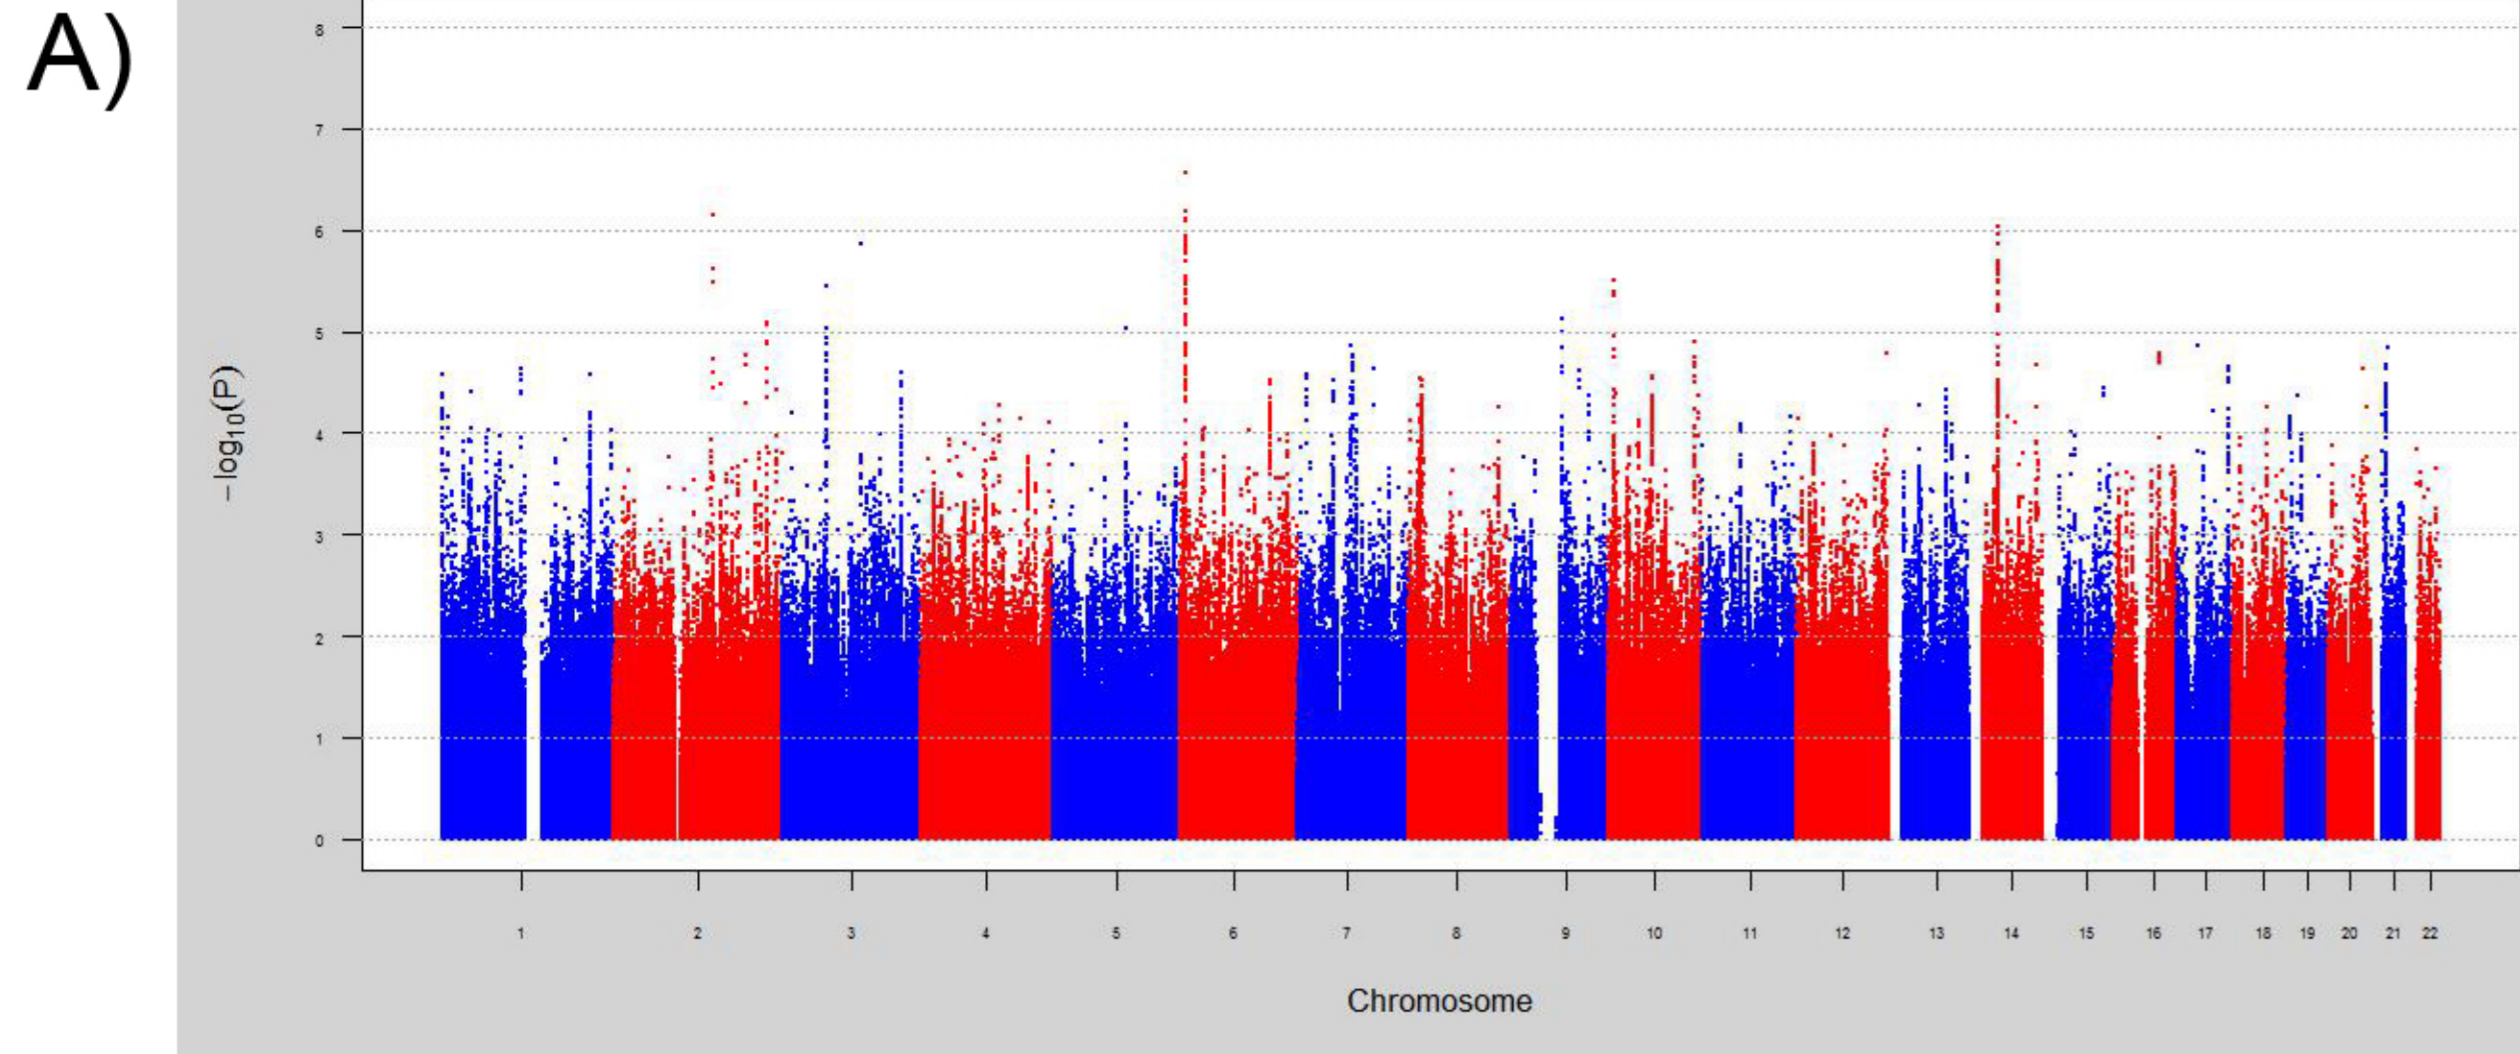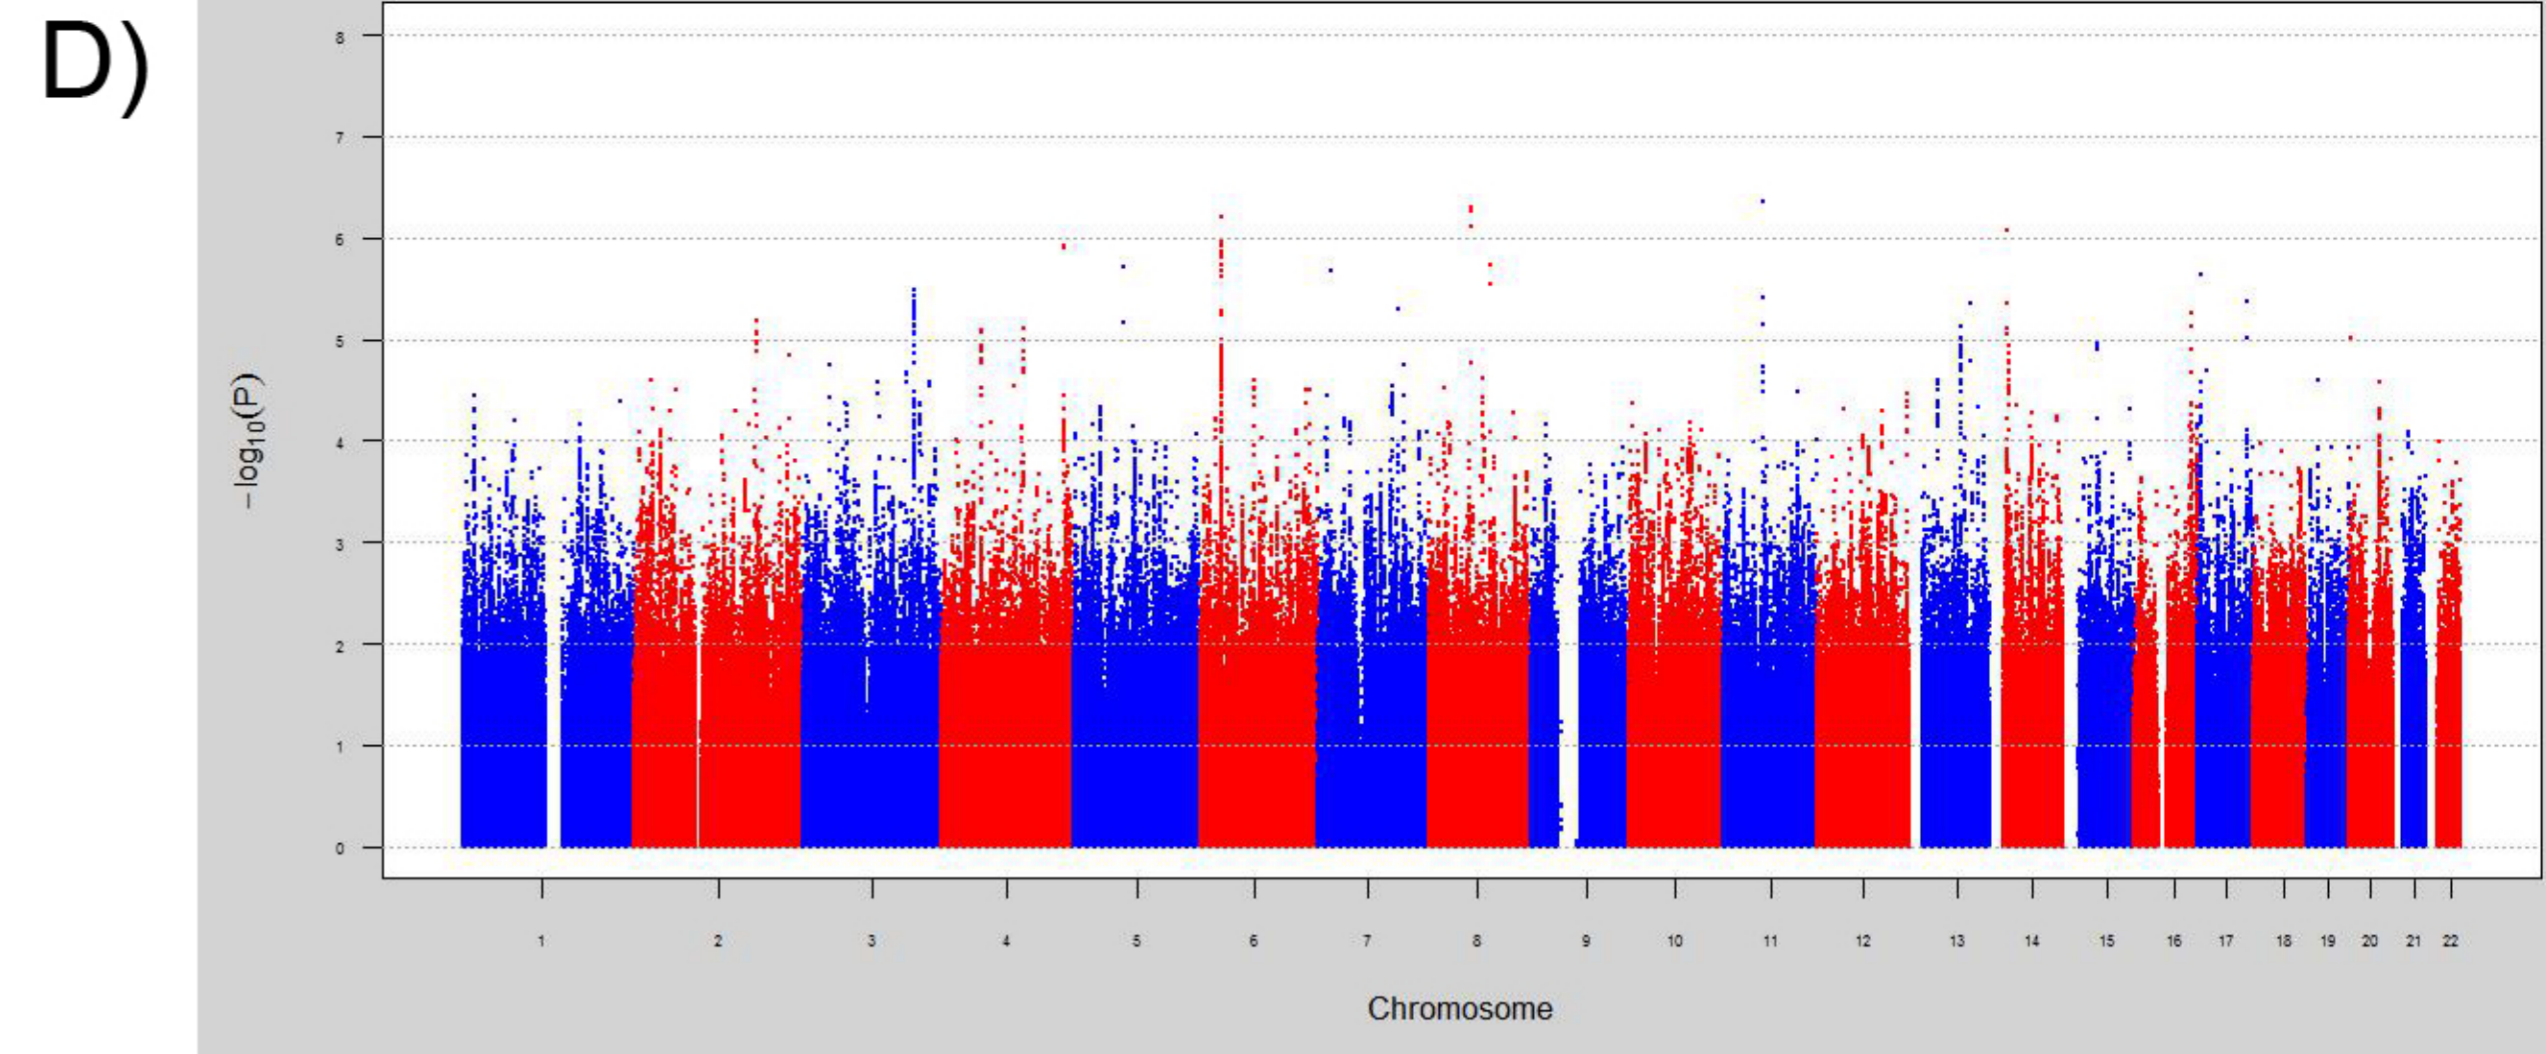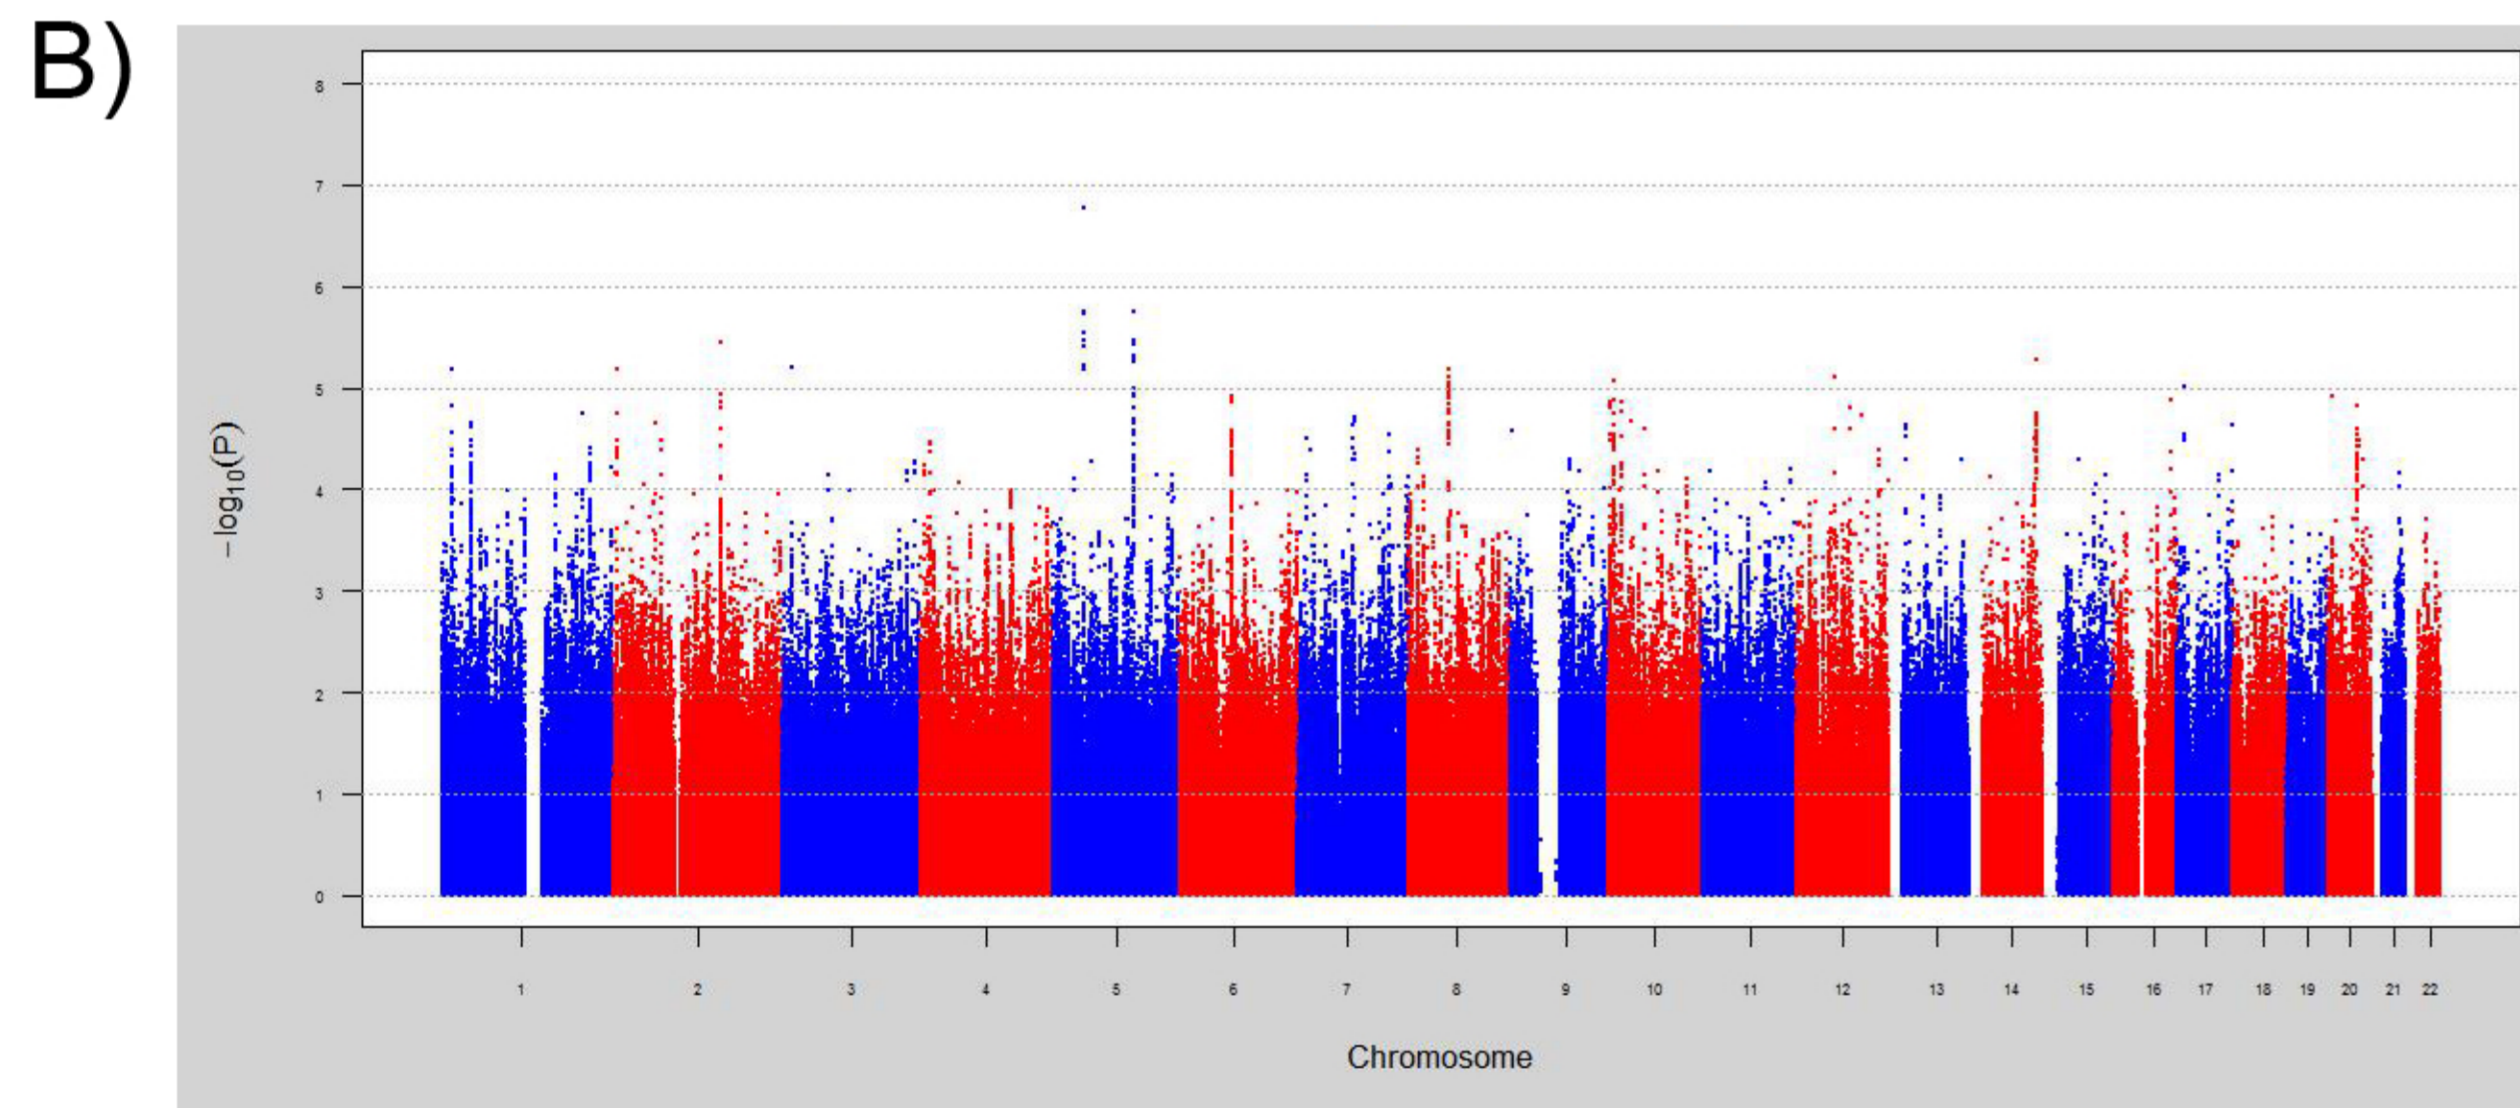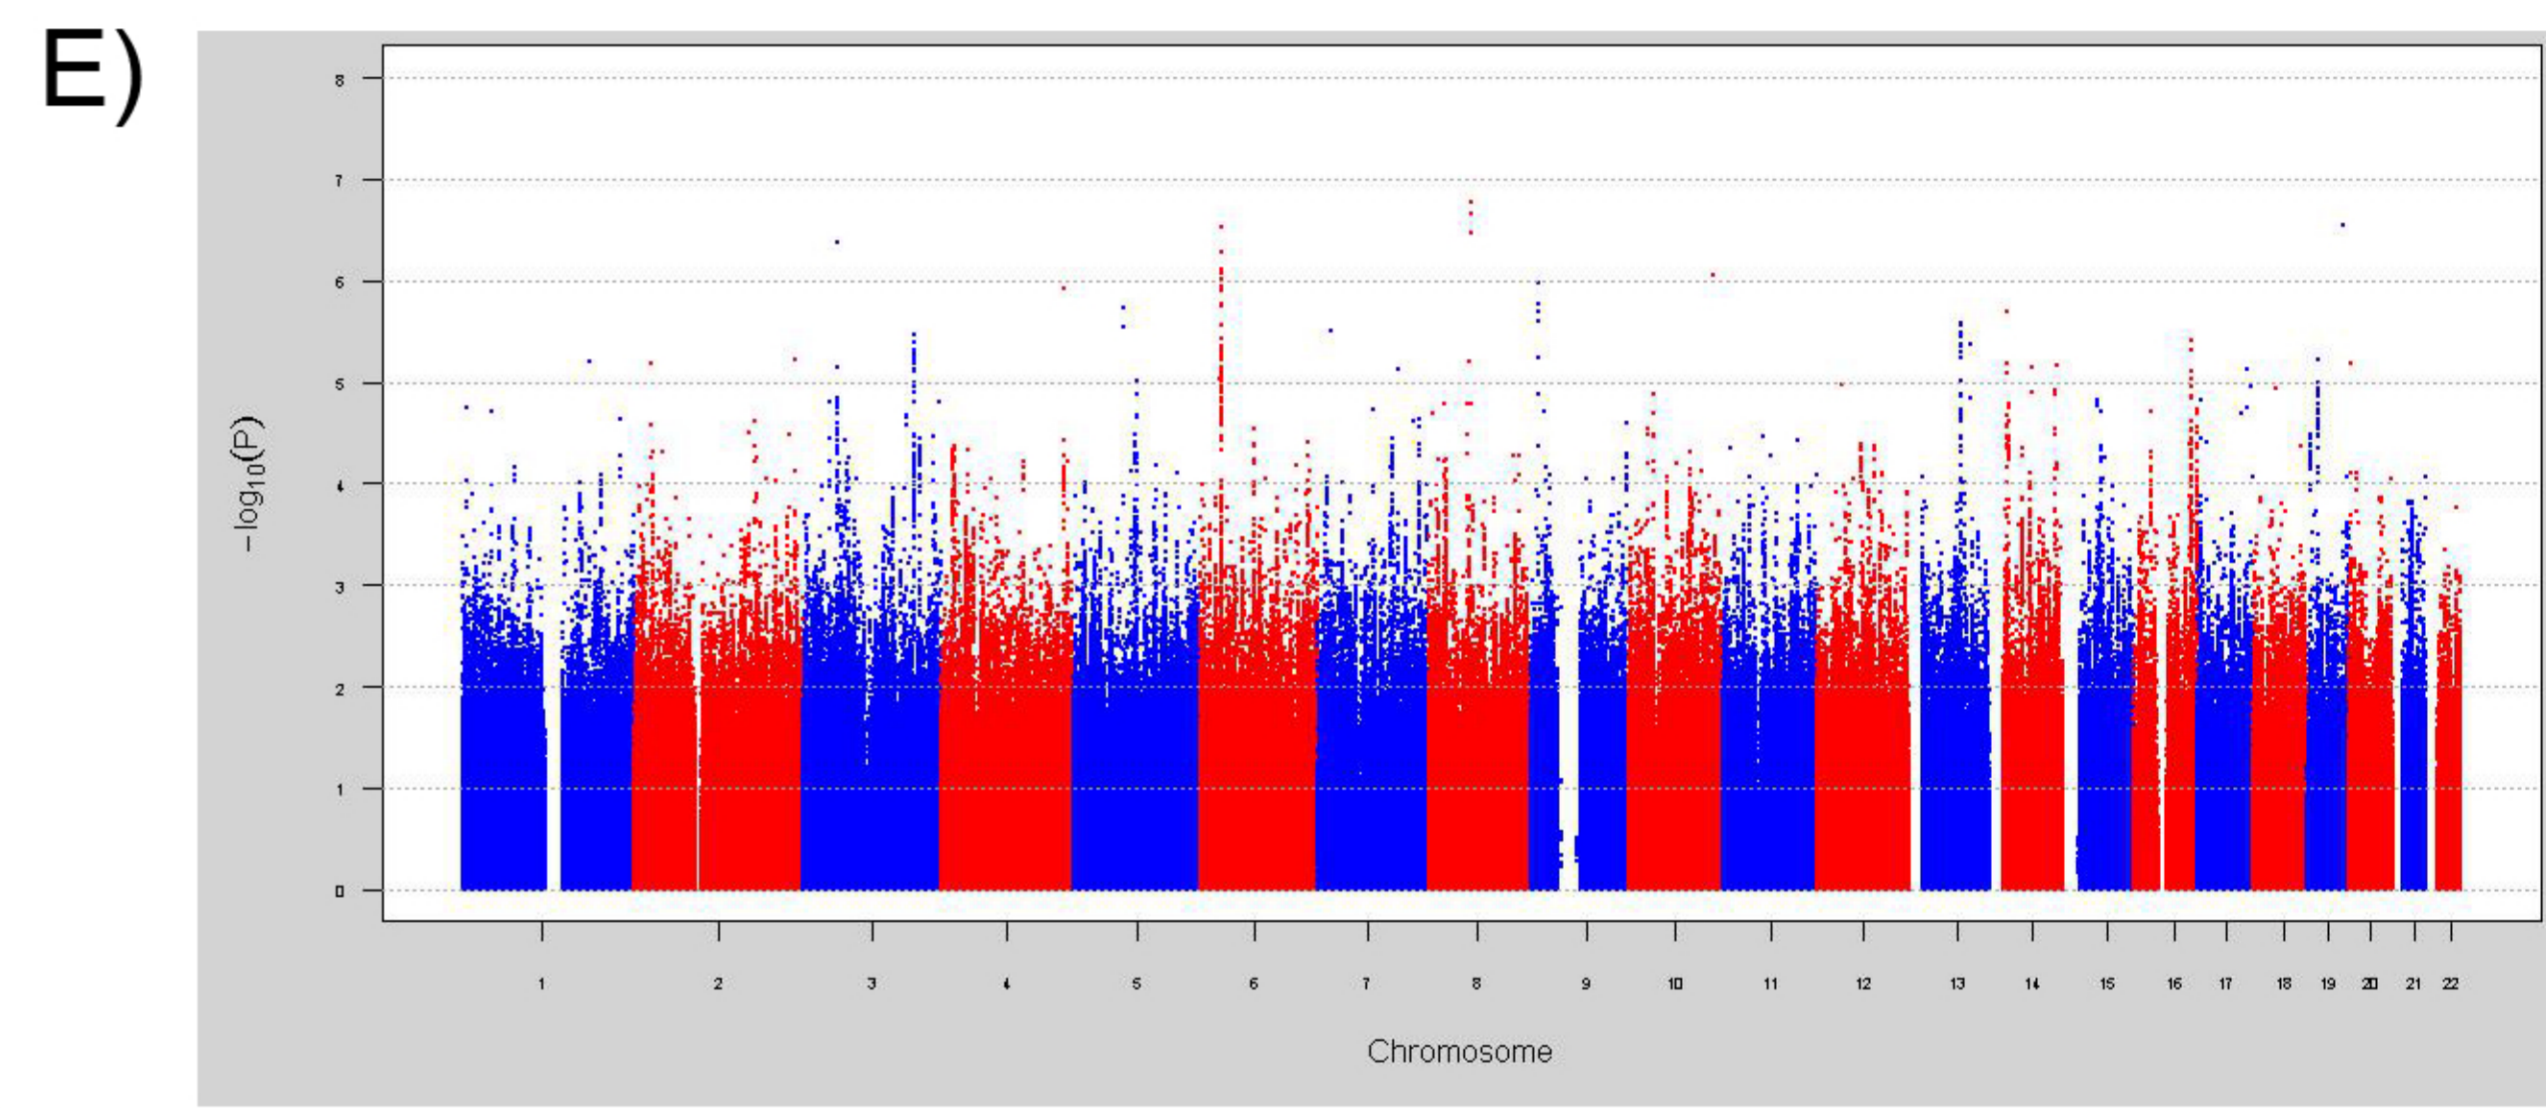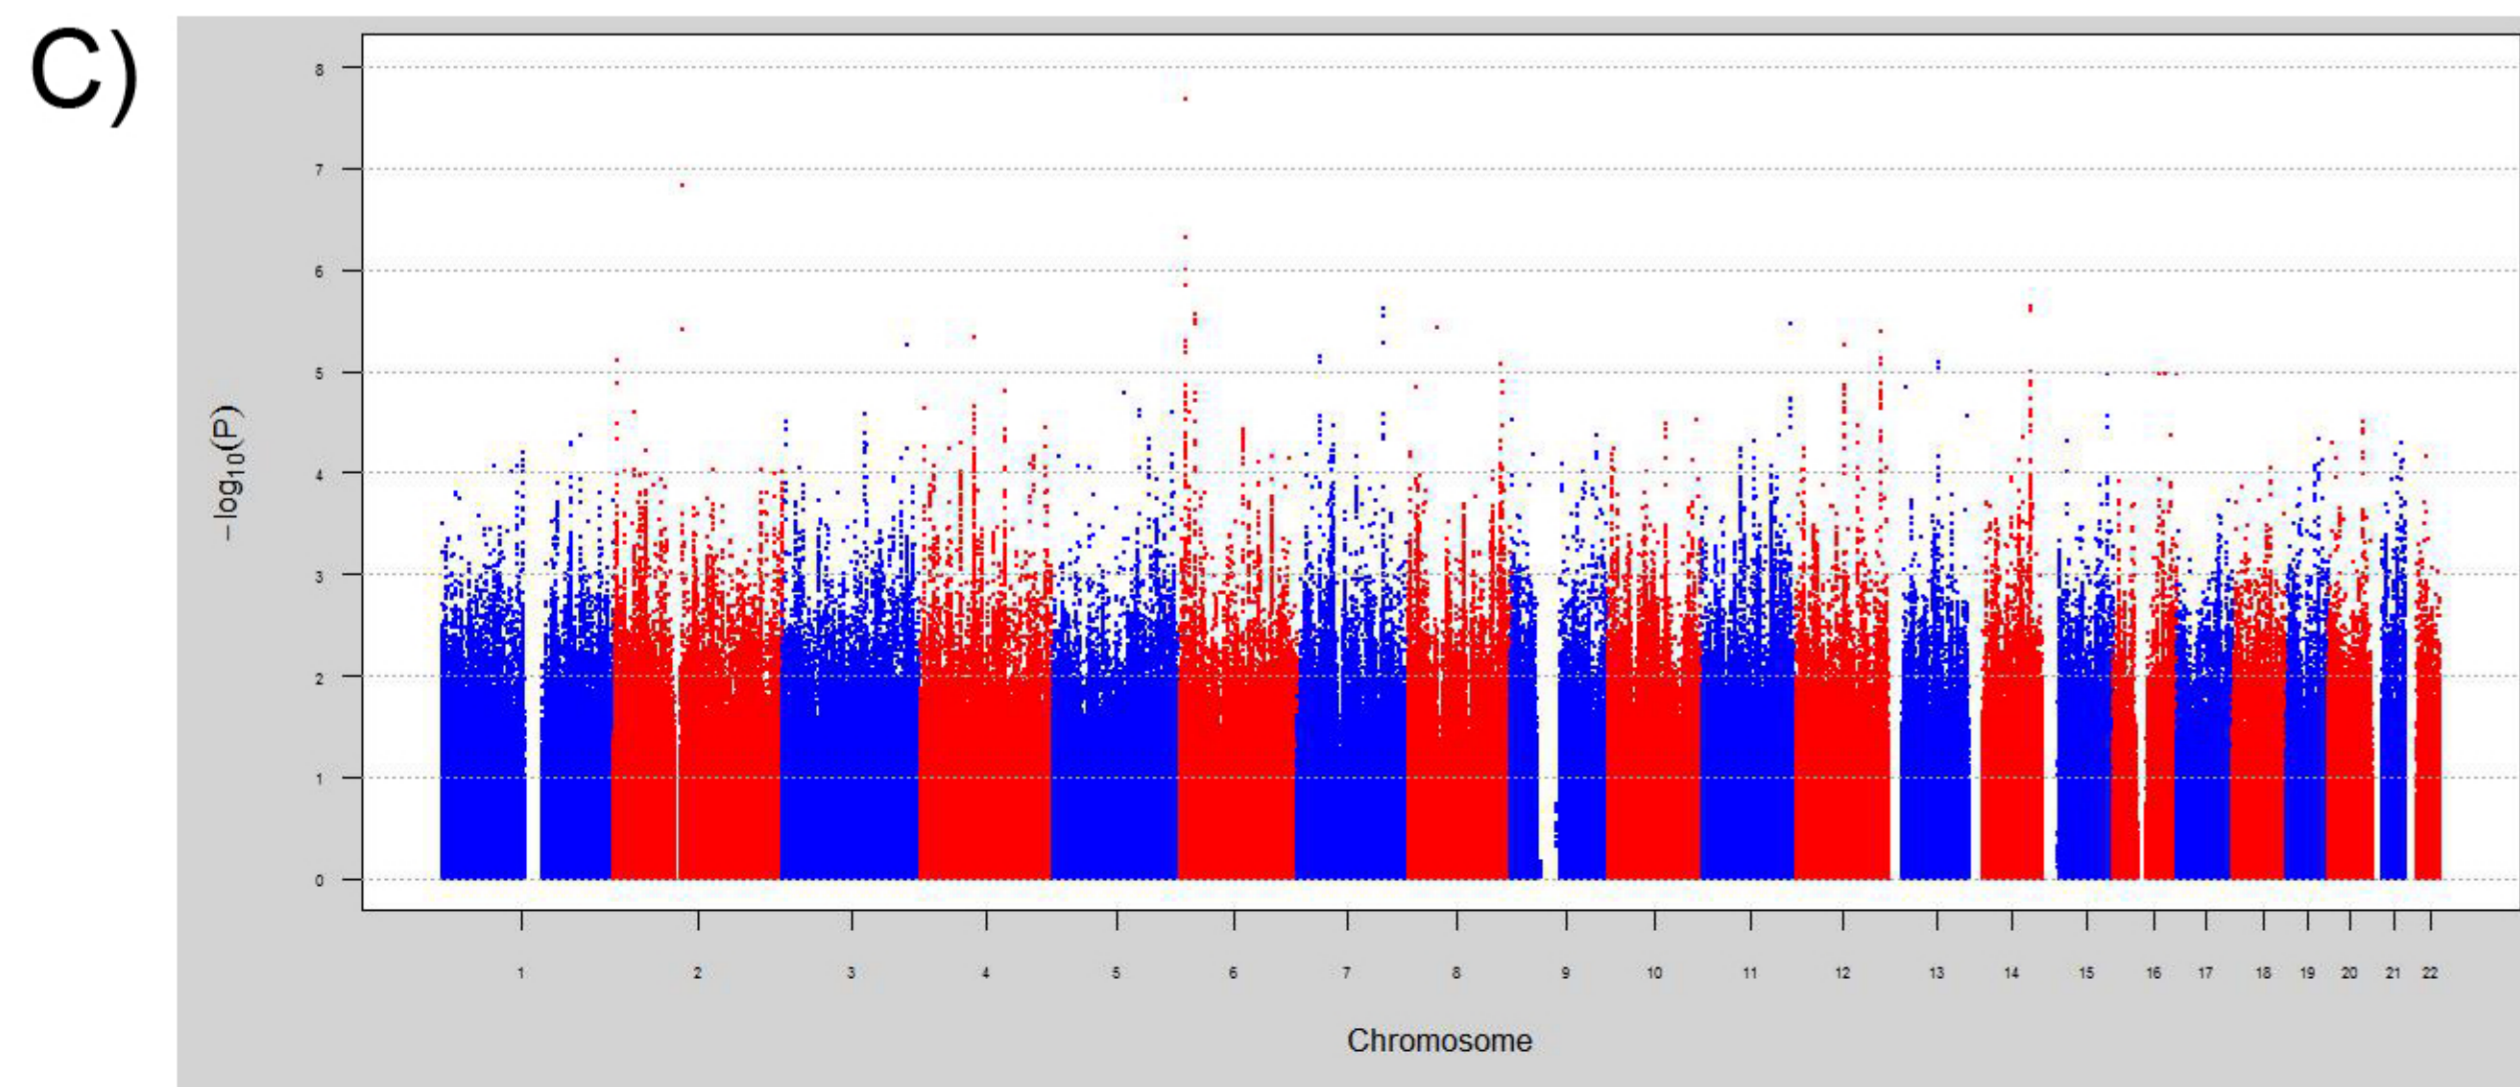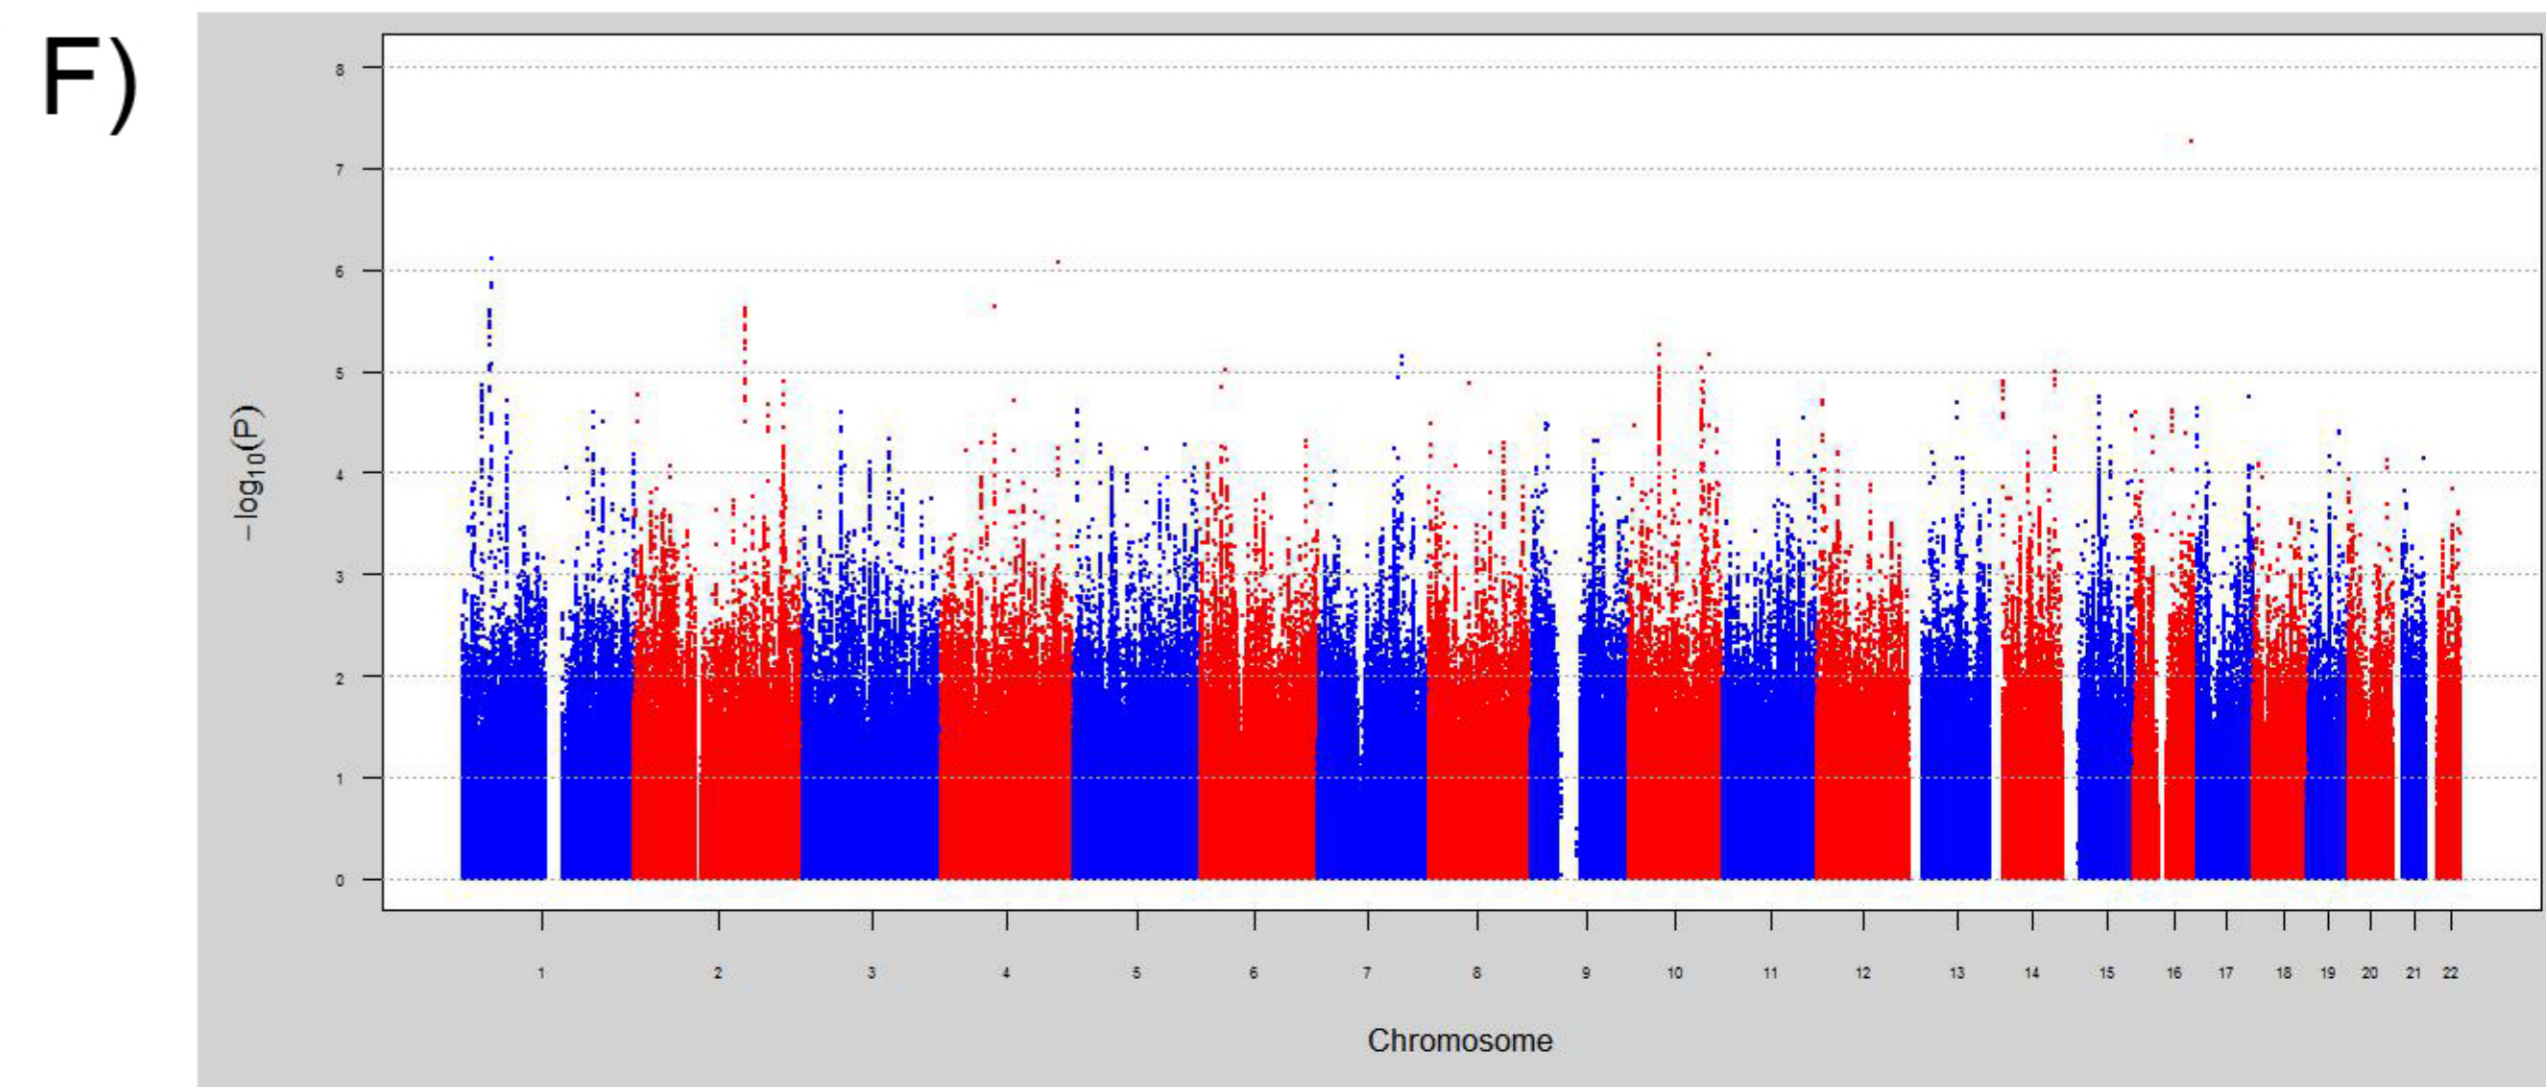

Supplement: NIHMS864518-supplement-001449_-_Supplemental_Material.pdf [file NIHMS864518-supplement-001449_-_Supplemental_Material.pdf]
